# Supplementary material
Source: PubMed Central journal article supplement (PMC5041483)
Supplement: supp_gkw687_nar-01215-h-2016-File006.pdf [file supp_gkw687_nar-01215-h-2016-File006.pdf]

## Supplementary Information

### **A microbial sensor for organophosphate hydrolysis exploiting an engineered specificity switch in a transcription factor**

Ramesh K. Jha<sup>1,\*</sup>, Theresa L. Kern<sup>1,a</sup>, Youngchang Kim<sup>2,a</sup>, Christine Tesar<sup>2</sup>, Robert Jedrzejczak<sup>2</sup>, Andrzej Joachimiak<sup>2,3</sup> and Charlie E. M. Strauss<sup>1,\*</sup>

<sup>1</sup> Bioscience Division, PO Box 1663, Los Alamos National Laboratory, Los Alamos NM 87545, USA

<sup>2</sup> The Midwest Center for Structural Genomics and Structural Biology Center, Biosciences, Argonne National Laboratory, Argonne, IL 60439, USA

<sup>3</sup> Department of Biochemistry and Molecular Biology, University of Chicago, Illinois 60637, USA.

\* To whom correspondence should be addressed. Tel: +1-505-431-6193; Fax: +1-505-665-3024; Email: [cems@lanl.gov](mailto:cems@lanl.gov)

Correspondence may also be addressed to: Tel: +1-505-412-1666; Fax: +1-505-665-3024; Email: [rjha@lanl.gov](mailto:rjha@lanl.gov)

<sup>a</sup> Equal contributions

## SECTION 1: FASTA SEQUENCES

### A) *pobR* intergenic region in *Acinetobacter* sp ADP1

← (*pobR*) CATaacattcaaataccaaaatggTTTTgtccgatcatcggacagttgtaatgctaatacggataatTTTga  
gccttgattatagatgtctTTTTaatgagggcggtactTTAAAAatagaaaatagcaaggatgatgTTATG (*pobA*) →

-PobR operator region is underlined. Inverted repeats are marked with arrows (1).

### B) *pobR* intergenic region adapted for *E. coli*

← (*pobR*) CATaacattcaaataccaaaatggTTTTgtccgatcatcggacagttgtaatgctaatacggataatTTTga  
gccttgattatagatgtctTTTTaatgagggcggtactTTAAAAatagaaaatagc**aagga**GATATACATATG (*gfp*)  
→

-Mutated bases are shown in bold and uppercase letters. *E. coli* RBS is highlighted in yellow. RBS in *pobR-pobA* has high sequence identity with *E. coli* consensus RBS sequence.

### C) *pobR*-wt sequence adapted for *E. coli*

ATGGAACAACACCATCAGTATTTGGCGCATCCGCATTTCGAGCGAAGAGATTTCGTACAGAGGACTACATCGCGGGACT  
GGCAAAGGTCTGGCGTTACTGGAAGCGTTTGGCATTGATCGGCAGCGCTTAAACGTGACACAGGTAGCTGAACGCA  
CCGGCATTAGCCGTACAGCAGCTCGTCGCTATCTGAAAACCCTGAAGTTTCTGGGTTACCTGGATACTGACGAACAC  
TACTTCTGGTTAACCATCGTGTTTTGCGCTTCTCTTCGAGCTATCTGAGTTCAGCGCATTTCGCGAAAGTGGCCCA  
ATCTTTCCTCAATCTGCTGTGTGCGCAGACGAGTCTGACGTTTAGCATTGTGGTCCTGGATGAACACGAGGTGGTTC  
CAGTCGCCCCGTTCTATCTGCCTCAGCAAGACAATTGCGCGTCAGTCCGTATGGCATGCACTTAGGGAATCGTCTG  
CCTGCGCATGCTACCTCAACCGGTAAAGTGCTTCTTAGCGTGCTTGATCGCGAAGTACAGATCGAGTGGATCGAGAA  
GTATGGCCTGAAACGCCTGACGCCGTATAACCATCACCGATGAACACACCTTTCTTGAACCCTGGATGCCGTTTCGTC  
AGTCGGATTACTGCTTATCCACGGAAGAACATGAGCTCGGTCTGATTGCCATTGCGGTTCCAGTCTCAACGCACAA  
GGGCTGACGATTGCAGCCCTGAACTGCATGTCCCAGACTAATCGGGTTCAACCCAGTACCTCATCGACCAGGTGTT  
ACCGTTGCTGCGCAACACTGCCAACGAAGTGCAGCAATCTGGTATAA

### D) DoubleMut sequence

ATGGAACAACACCATCAGTATTTGGCGCATCCGCATTTCGAGCGAAGAGATTTCGTACAGAGGACTACATCGCGGGACT  
GGCAAAGGTCTGGCGTTACTGGAAGCGTTTGGCATTGATCGGCAGCGCTTAAACGTGACACAGGTAGCTGAACGCA  
CCGGCATTAGCCGTACAGCAGCTCGTCGCTATCTGAAAACCCTGAAGTTTCTGGGTTACCTGGATACTGACGAACAC  
TACTTCTGGTTAACCATCGTGTTTTGCGCTTCTCTTCGAGCTATCTGAGTTCAGCGCATTTCGCGAAAGTGGCCCA  
ATCTTTCCTCAATCTGCTGTGTGCGCAGACGAGTCTGACGTTTAGCATTGTGGTCCTGGATGAACACGAGGTGGTTC  
CAGTCGCCCCGTTCTATCTGCCTCAGCAAGAC**AACCGC**GTCAGTCCGTATGGCATGCACTTAGGGAATCGTCTGCCT  
GCGCATGCTACCTCAACCGGTAAAGTGCTTCTTAGCGTGCTTGATCGCGAAGTACAGATCGAGTGGATCGAGAAGTA  
TGGCCTGAAACGCCTGACGCCGTATAACCATCACCGATGAACACACCTTTCTTGAACCCTGGATGCCGTTTCGTCAGT  
CGGATTACTGCTTATCCACGGAAGAACATGAGCTCGGTGTTGATTGCCATTGCGGTTCCAGTCTCAACGCACAAGGG  
CTGACGATTGCAGCCCTGAACTGCATGTCCCAGACTAATCGGGTTCAACCCAGTACCTCATCGACCAGGTGTTACC  
GTTGCTGCGCAACACTGCCAACGAAGTGCAGCAATCTGGTATAA

-The codon TTG originally between AAC and CGC (highlighted yellow) in *pobR*-wt is deleted to represent deleted L141 residue in DoubleMut.

-The underlined codon represents L220V mutation in DoubleMut.

### E) *pNpmut1* sequence

ATGGAACAACACCATCAGTATTTGGCGCATCCGCATTTCGAGCGAAGAGATTCGTACAGAGGACTACATCGCGGGACT  
GGCAAAAGGTCTGGCGTTACTGGAAGCGTTTGGCATTGATCGGCAGCGCTTAAACGTGACACAGGTAGCTGAACGCA  
CCGGCATTAGCCGTACAGCAGCTCGTCGCTATCTGAAAACCCTGAAGTTTCTGGGTTACCTGGATACTGACGAACAC  
TACTTCTGGTTAACCCATCGTGTGTTTGGCGTTCTCTTCGAGCTATCTGAGTTCAGCGCATTTCGCCGAAAGTGGCCCA  
ATCTTTCTCAATCTGCTGTGTGCGCAGACGAGTCTGACGTTTACCATTGTGGTCCTGGATGAACACGAGGTGGTTC  
CAGTCGCCCCGTTCTATCTGCCTCAGCAAGACAACCCGCCTCAGTCCGTATGGCATGCACTTAGGGAATCGTCTGCCT  
GCGCATGCTATCGCAACCCGGTAAAGTGCTTCTTAGCGTGCTTGATCGCGAAGTACAGATCGAGTGGATCGAGAAGTA  
TGGCCTGAAACGCCTGACGCCGTATACCATCACCGATGAACACACCTTTCTTGAAACCCTGGATGCCGTTTCGTGAGT  
CGGATTACTGCTTAACCACGGAAGAATATGAGCTCGGTGTGATTGGCATTGCGGTTCCAGTCTCAACGCACAAGGG  
CTGACGATTGCAGCCCTGAACTGCCTGTCCAGACTAATCGGGTTCAACCCAGTACCTCATCGACCAGGTGTTACC  
GTTGCTGCGCAACACTGCCAACGAACCTGCGCAATCTGGTATAA

-Codons mutated from DoubleMut are underlined.

**F) Insert consisting of regulatory region and pNPMut1 gene for Nhe1/Cla1 digested pGLO vector**

← (*gfp*)  
GCTAGC CATatgtatatctccttgctatTTTTctatTTTTtaagtagccgctcattaaaaagacatctataatcaagg  
ctcaaaatta tccgattagcattacaactgtccgatgatcggacaaaaccattttggatttgaatggt ATGGAACAA  
CACCATCAGTATTTGGCGCATCCGCATTTCGAGCGAAGAGATTCGTACAGAGGACTACATCGCGGGACTGGCAAAAGG  
TCTGGCGTTACTGGAAGCGTTTGGCATTGATCGGCAGCGCTTAAACGTGACACAGGTAGCTGAACGCACCCGGCATT  
GCCGTACAGCAGCTCGTCGCTATCTGAAAACCCTGAAGTTTCTGGGTTACCTGGATACTGACGAACACTACTTCTGG  
TTAACCCATCGTGTGTTTGGCGTTCTCTTCGAGCTATCTGAGTTCAGCGCATTTCGCCGAAAGTGGCCCAATCTTTCT  
CAATCTGCTGTGTGCGCAGACGAGTCTGACGTTTACCATTGTGGTCCTGGATGAACACGAGGTGGTTCCAGTCGCCC  
GTTTCTATCTGCCTCAGCAAGACAACCCGCCTCAGTCCGTATGGCATGCACTTAGGGAATCGTCTGCCTGCGCATGCT  
ATCGCAACCCGGTAAAGTGCTTCTTAGCGTGCTTGATCGCGAAGTACAGATCGAGTGGATCGAGAAGTATGGCCTGAA  
ACGCCTGACGCCGTATACCATCACCGATGAACACACCTTTCTTGAAACCCTGGATGCCGTTTCGTGAGTCCGATTACT  
GCTTAACCACGGAAGAATATGAGCTCGGTGTGATTGGCATTGCGGTTCCAGTCTCAACGCACAAGGGCTGACGATT  
GCAGCCCTGAACTGCCTGTCCAGACTAATCGGGTTCAACCCAGTACCTCATCGACCAGGTGTTACCAGTTGCTGCG  
CAACTGCCAACGAACCTGCGCAATCTGGTA TAAttggtaacgaatcagacaattgacggcttgaaggagtagcata  
gggtttgcagaatccctgcttccatttgacaggcacattatgcatcgat

- Nhe1 and Cla1 restriction sites are highlighted grey.
- Start codons for *gfp* and *pNPMut1* are highlighted green.
- Stop codon for *pNPMut1* is highlighted red.
- PobR operator is underlined, with inverted repeats marked with arrows.
- Promoter proximal inverted repeat sequence of the operator is highlighted yellow.

**G) pNPMut1-1 based insert for sensor plasmid highlighting two mutational differences from pNPMut1**

← (*gfp*)  
GCTAGC CATatgtatatctccttgctatTTTTctatTTTTtaagtagccgctcattaaaaagacatctataatcaagg  
ctcaaaatta tccgCttagcattacaactgtccgatgatcggacaaaaccattttggatttgaatggt ATGGAACAA  
CACCATCAGTATTTGGCGCATCCGCATTTCGAGCGAAGAGATTCGTACAGAGGACTACATCGCGGGACTGGCAAAAGG  
TCTGGCGTTACTGGAAGCGTTTGGCATTGATCGGCAGCGCTTAAACGTGACACAGGTAGCTGAACGCACCCGGCATT  
GCCGTACAGCAGCTCGTCGCTATCTGAAAACCCTGAAGTTTCTGGGTTACCTGGATACTGACGAACACTACTTCTGG  
TTAACCCATCGTGTGTTTGGCGTTCTCTTCGAGCTATCTGAGTTCAGCGCATTTCGCCGAAAGTGGCCCAATCTTTCT  
CAATCTGCTGTGTGCGCAGACGAGTCTGACGTTTACCATTGTGGTCCTGGATGAACACGAGGTGGTTCCAGTCGCCC  
GTTTCTATCTGCCTCAGCAAGACAACCCGCCTCAGTCCGTATGGCATGCACTTAGGGAATCGTCTGCCTGCGCATGCT  
ATCGCAACCCGGTAAAGTGCTTCTTAGCGTGCTTGATCGCGAAGTACAGATCGAGTGGATCGAGAAGTATGGCCTGAA  
ACGCCTGACGCCGTATACCATCACCGATGAACACACCTTTCTTGAAACCCTGGATGCCGTTTCGTGAGTCCGATTACT  
GCTTAACCACGGAAGAATATGAGCTCGGTGTGATTGGCATTGCGGTTCCAGTCTCAACGCACAAGGGCTGACGATT  
GCAGCCCTGAACTGCCTGTCCAGACTAATCGGGTTCAACCCAGTACCTCATCGACCAGGTGTTACCAGTTGCTGCG

CAACACTGCCAACGAACTGCGCAATCTGGTA**TAA**ttggtaacgaatcagacaattgacggcttgacggagtagcata  
gggtttgcagaatccctgcttcgtccatttgacagggcacattatgcatcgat

-Two mutations occurring in the operator and in *pN<sup>P</sup>mut* gene are shown in uppercase bold characters and marked with bold underline. The first mutation results in subtle decrease in constitutive response of the transcription factor while the second mutation converts Aspartate 139 to Asparagine residue and enhances the response amplitude and contrast ratio significantly.

## SECTION 2: TABLES & FIGURES

Supplementary Table S1. Data collection and refinement statistics

|                                                | DoubleMut-IBD                       | DoubleMut-IBD • 3HB       |
|------------------------------------------------|-------------------------------------|---------------------------|
| <b>Data collection</b>                         |                                     |                           |
| Space group                                    | I422                                | C222 <sub>1</sub>         |
| Cell dimensions                                |                                     |                           |
| <i>a</i> , <i>b</i> , <i>c</i> (Å)             | 111.35, 111.35, 282.17              | 83.49, 125.66, 156.67     |
| Protein molecules/ASU                          | 3                                   | 4                         |
| Temperature (K)                                | 100                                 | 100                       |
| Radiation source                               | APS, 19-ID                          | APS, 19-ID                |
| Wavelength (Å)                                 | 0.97934                             | 0.97934                   |
| Resolution (Å)                                 | 40.38-2.30 (2.34-2.30) <sup>a</sup> | 49.0-2.95 (3.00-2.95)     |
| Unique reflections                             | 37751 (1897)                        | 16803 (777)               |
| $R_{\text{merge}}^b$                           | 0.119 (0.753)                       | 0.157 (0.827)             |
| $\langle I \rangle / \langle \sigma I \rangle$ | 23.1(3.1)                           | 7.5(1.3)                  |
| Completeness (%)                               | 96.4 (98.0)                         | 96.2 (88.9)               |
| Redundancy                                     | 7.8 (7.8)                           | 4.3 (4.0)                 |
| <b>Refinement</b>                              |                                     |                           |
| Resolution (Å)                                 | 2.31 (2.37-2.31)                    | 2.96 (3.15-2.96)          |
| Reflections: work/test set                     | 35868/1874 (2548/118)               | 15834/817(2318/138)       |
| $R_{\text{work}}/R_{\text{free}}^c$            | 0.170/0.215 (0.225/0.279)           | 0.197/0.258 (0.269/0.311) |
| No. of atoms                                   | 4138/57/118                         | 5467/77/13                |
| protein/ligands <sup>d</sup> /water            |                                     |                           |
| Average <i>B</i> factor (Å <sup>2</sup> )      | 58.7/96.0/54.0                      | 76.5/80.0/41.9            |
| protein/ligands/water                          |                                     |                           |
| Bond lengths (Å)                               | 0.008                               | 0.009                     |
| Bond angles (°)                                | 0.925                               | 0.977                     |
| Most favored                                   | 97.9                                | 94.8                      |
| Outliers                                       | 0.39                                | 0.15                      |
| <b>PDB ID</b>                                  | 5HPF                                | 5HPI                      |

<sup>a</sup>All numbers in parentheses are from the highest resolution shells, <sup>b</sup> $R_{\text{merge}} = \frac{\sum_{hkl} \sum_i |I_i(hkl) - \langle I(hkl) \rangle|}{\sum_{hkl} \sum_i \langle I_i(hkl) \rangle}$ , where  $I_i(hkl)$  is the intensity for the *i*th measurement of an equivalent reflection with indices *h*, *k*, and *l*, <sup>c</sup> $R = \frac{\sum_{hkl} | |F_{\text{obs}}| - |F_{\text{calc}}| |}{\sum_{hkl} |F_{\text{obs}}|}$ , where  $F_{\text{obs}}$  and  $F_{\text{calc}}$  are observed and calculated structure factors, respectively.

**Supplementary Table S2.** Diversification of promoter proximal inverted repeat of PobR operator and insertion and deletion to modify the distance between operator and promoter

|                                                |                                                                        |
|------------------------------------------------|------------------------------------------------------------------------|
| Native intergenic sequence                     | ...CATCTATAATCAAGGCTCAAAAATT <b>ATCCGAT</b> TAGCATTACAACGTCCGATGATC... |
| Randomization (Primer 1)                       | CATCTATAATCAAGGCTCAAAAATT <b>ATNNNNN</b> TAGCATTACAACGTCCGATGATC       |
| Randomization with single deletion (Primer 2)  | CATCTATAATCAAGGCTCAAAAATT <b>ANNNNN</b> TAGCATTACAACGTCCGATGATC        |
| Randomization with double deletion (Primer 3)  | CATCTATAATCAAGGCTCAAAAATT <b>NNNNN</b> TAGCATTACAACGTCCGATGATC         |
| Randomization with single insertion (Primer 4) | CATCTATAATCAAGGCTCAAAAATT <b>ATANNNNN</b> TAGCATTACAACGTCCGATGATC      |
| Randomization with double insertion (Primer 5) | CATCTATAATCAAGGCTCAAAAATT <b>ATANNNNN</b> TAGCATTACAACGTCCGATGATC      |

-Equimolar mix of primers 1 to 5 was used with an appropriate reverse primer to amplify the native intergenic sequence and then assemble it using overlapping oligonucleotide PCR assembly method (2).  
 - Theoretical diversity of the library was  $5 \times 10^3$ .

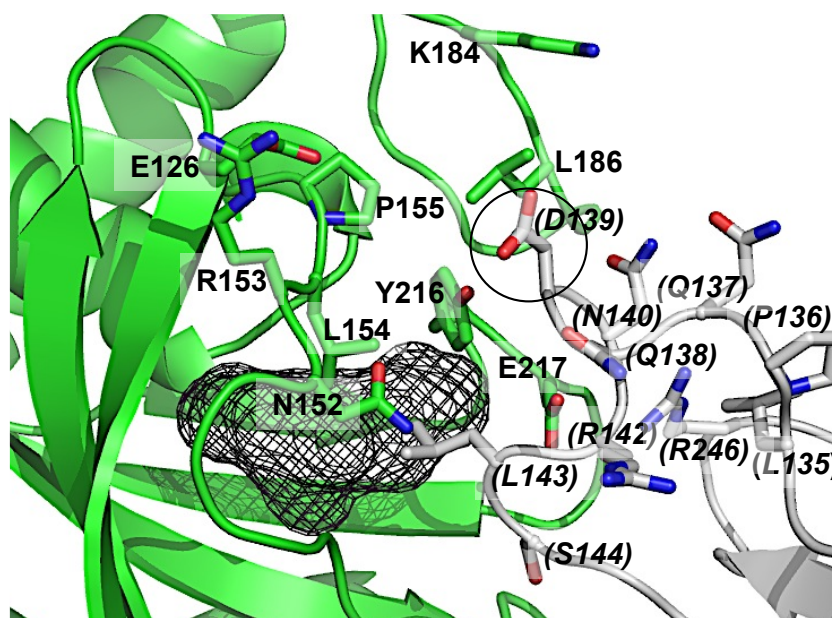

**Supplementary Figure S1.** Dimer model of pNPmut1 based on symmetric homodimer model of DoubleMut inducer binding domain. Single base change resulted in mutation of D139 (circled) to Asparagine. Residues in 8 Å radius, which could be affected by the mutation directly or indirectly are shown as sticks and labeled. Intrachain neighbors of D139 are labeled in parentheses and shown in *italics*. Possible positioning of pNP in pNPmut1 model is depicted as a ‘mesh’ and is based on top 10 unique conformations of pNP in the IBD pocket.



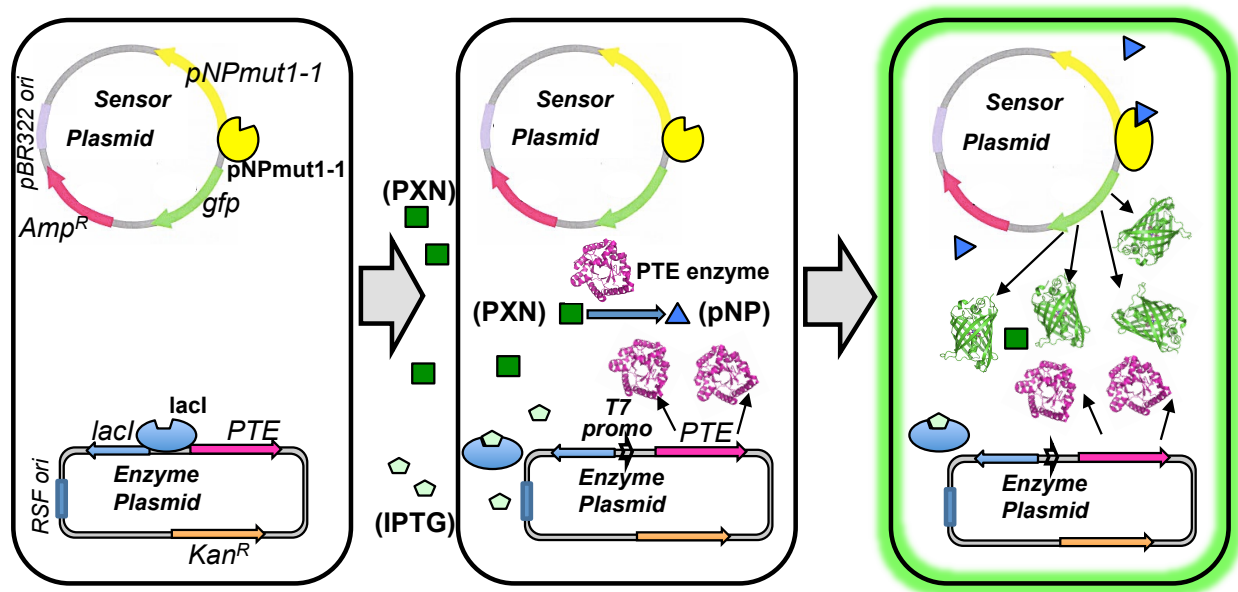

**Supplementary Figure S4.** A smart microbial cell and a workflow showing reagent addition, intracellular enzyme expression and catalytic activity resulting in activation of the pNP specific transcription factor. Activation of pNPmut1-1 results in expression of green fluorescent protein (GFP), which ultimately makes the cells fluorescent. The figure has been recreated from our earlier work (3).

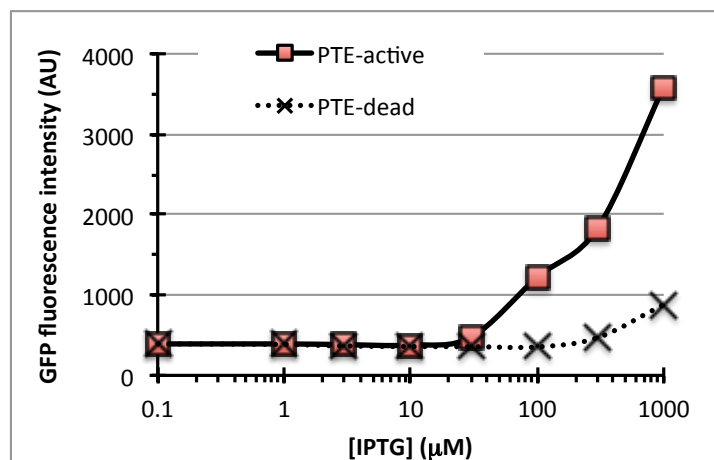

**Supplementary Figure S5.** Fluorescence intensity of smart microbial cells in the presence of varying IPTG concentration that controls the expression level of phosphotriesterase (PTE) enzyme. Two variants of PTE (PTE-active consisting of PTE<sup>K185R/1274N</sup> and PTE-dead consisting of PTE<sup>K185R/1274N/W131K/F306E</sup>) expressed in *E. coli* result in different level of cell fluorescence. PTE-active is similar to wild-type PTE (PTE\_WT) in terms of catalytic efficiency (kcat/Km), but is expected to be a higher expressing variant than PTE\_WT. W131K and F306E mutations to PTE result in 4- and 3-orders of magnitude weaker catalytic efficiency independently (when Co<sup>2+</sup> is used as a cofactor) (4) and these mutations were combined in a construct to create PTE-dead version.



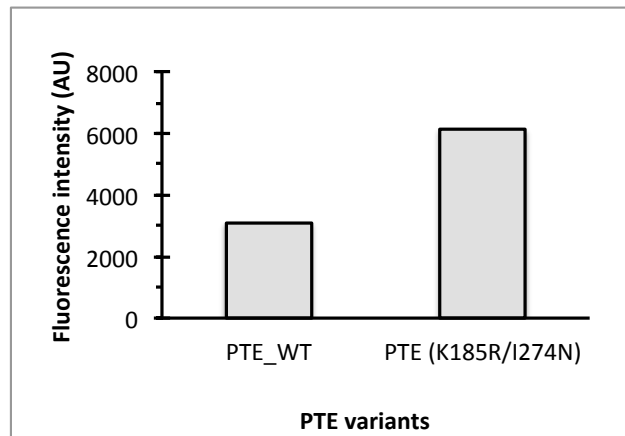

**Supplementary Figure S6.** Effect of K185R and I274N mutations on the wild-type PTE activity. The variants have similar catalytic efficiency but earlier work showed mutations resulted in increase in cell lysate activity (5) possibly due to increase in expression level. Our smart microbial cell format also confirmed the previous observation by showing increase in cell fluorescence intensity when the mutant PTE was expressed inside the cell.

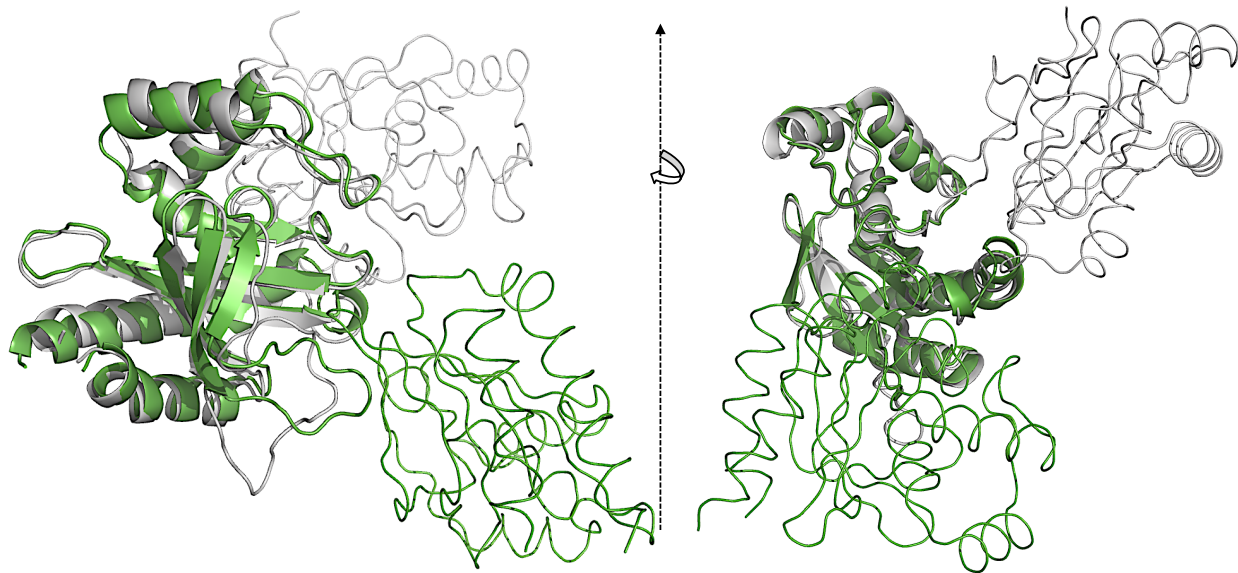

**Supplementary Figure S7.** Alternate views of DoubleMut-IBD crystal structure dimer (light grey) overlaid on IclR dimer template for homology modeling (green, PDB code 2IA2). While inducer binding domains (IBD) of the template 2IA2 are in C2 symmetry, the crystal structure is asymmetric. One of the possibilities for such an observation is that in the absence of DNA binding domains (which form tighter dimers) and DNA operator, the canonical weak IBD homodimer interface failed to form in the crystal structure.

## SECTION 3: COMPUTATIONAL MODELING

Rosetta scripts and step-by-step protocol for homology modeling and ligand-docking related to the present work has been also discussed earlier (6).

1. Structural template for homology modeling: 2ia2.pdb  
Create a dimer based on chains A and C each from Residue 91-263. The domains are in C2 symmetry. The dimer is called 2ia2\_dimer.pdb

2. Using a perl script in Rosetta version 3.4 or later, create symmetry definition file

```
>perl  
~/rosetta3.4/rosetta_source/src/apps/public/symmetry/make_symmdef_file.pl -  
mode NCS -a A -i B -p input_files/2ia2_dimer.pdb >  
input_files/symm_def_2ia2_dimer.dat
```

**symm\_def\_2ia2\_dimer.dat** is shown below:

```
symmetry_name input_files/2ia2_dimer__2  
E = 2*VRT0_base + 1*(VRT0_base:VRT1_base)  
anchor_residue 71  
virtual_coordinates_start  
xyz VRT0 0.1937758,-0.2263170,0.9545845 0.7596052,0.6503845,0.0000000  
10.3784383,11.2616803,48.4682588  
xyz VRT0_base 0.1937758,-0.2263170,0.9545845 0.7596052,0.6503845,0.0000000  
6.9406243,15.2768150,31.5327861  
xyz VRT1 -0.1937758,0.2263170,-0.9545845 0.9804343,0.0790260,-0.1802873  
10.3784383,11.2616803,48.4682588  
xyz VRT1_base -0.1937758,0.2263170,-0.9545845 0.9804343,0.0790260,-  
0.1802873 13.8162524,7.2465455,65.4037314  
xyz VRT 1.0000000,0.0000000,0.0000000 0.0000000,1.0000000,0.0000000  
11.3784383,11.2616803,48.4682588  
virtual_coordinates_stop  
connect_virtual JUMP0_to_com VRT0 VRT0_base  
connect_virtual JUMP0_to_subunit VRT0_base SUBUNIT  
connect_virtual JUMP1_to_com VRT1 VRT1_base  
connect_virtual JUMP1_to_subunit VRT1_base SUBUNIT  
connect_virtual JUMP0 VRT VRT0  
connect_virtual JUMP1 VRT0 VRT1  
set_dof JUMP0_to_com x(17.7411980103447) angle_x  
set_dof JUMP0_to_subunit angle_x angle_y angle_z  
set_jump_group JUMPGROUP2 JUMP0_to_com JUMP1_to_com  
set_jump_group JUMPGROUP3 JUMP1_to_subunit JUMP0_to_subunit
```

3. Create an alignment file for query sequence and template sequence. The file name is 2ia2\_align.grishin, where first sequence is the query sequence for comparative modeling or DoubleMut (pobR ΔL141/L220V) and second sequence is the template (2ia2)

```
1  
HLPKVAQSFLNLLCAQTSLSLTFSSIVVLDEHEVVPVARSYLPQQDNRVSPYGMHLGNRLPAHATSTGKVLLSVLDREVQ  
IEWIEKYGLKRLTPYTITDEHTFLETLDVAVRQSDYCLSTEEHELGVIAIAVPVLAQGLTIAALNCMSQTNRVQPQY  
LIDQVLP LLRNTANELRNLV-----
```

```
0 SLPEVAQPHLEKLSHKVHESSSVSILDGADIVYVARVPVS----
RIMTVGITIGTRLPAYATSMGRVLLAGLPDDELDAYLEKLDIQRLTERTITARDELKAAILAVRADGICVLDQELEA
GLRSMAAPIRGASGLTVAAVNISTPAARYSLEDLHSDLIPSLRVTTATDIEQDLATVNR
--
```

4. Using Robetta server ([www.robetta.org](http://www.robetta.org)), to get following files for the query sequence

```
fasta file : t000_.fasta
secondary structure file: t000_.psipred_ss2
fragment files: aat000_09_05.200_v1_3, aat000_03_05.200_v1_3
```

5. Run command (Rosetta compilation for mpi runs required)

```
mpirun -np 159 /mypath/minirosetta.mpi.linuxgccrelease @options_symm_homology
```

where, **options\_symm\_homology** consist of following options:

```
-database /mypath/rosetta_database
-run:protocol threading
-in:file:alignment input_files/2ia2_align.grishin
-in:file:template_pdb input_files/2ia2_input.pdb
-symmetry_definition input_files/symm_def_2ia2_dimer.dat
-nstruct 20000 # a suitable number of trajectories
-in:file:extended_pose 1
-in:file:fasta input_files/t000_.fasta
-in:file:fullatom
-in:file:psipred_ss2 input_files/t000_.psipred_ss2
-loops:frag_sizes 9 3 1
-loops:frag_files input_files/aat000_09_05.200_v1_3
input_files/aat000_03_05.200_v1_3 none
-loops:random_order
-loops:random_grow_loops_by 4
-loops:remodel quick_ccd
-loops:relax relax
-relax:default_repeats 1
-relax:jump_move true
-loops:constrain_rigid_segments 0.3
-relax:coord_cst_width 2.0
-relax:coord_cst_stdev 1.0
-cm:loop_rebuild_filter 500
-cm:aln_format grishin
-cm:max_loop_rebuild 10
-cm:min_loop_size 4
-out:file:silent silent.out
```

6. Command line for cluster application and extracting PDB from silent file

```
/mypath/cluster.macosgccrelease @cluster_flags
```

where **cluster\_flags** consist of following options:

```
-database mypath/rosetta_database
-in:file:silent silent.out
-score:weights score13_env_hb
-in:file:fullatom
-input_score_filter 0
-in:file:silent_struct_type binary
```

```

-limit_cluster_size 5
-limit_clusters 5
-limit_total_structures 25
-cluster:radius 4.0
-sort_groups_by_energy
-out:prefix output/

```

#### 7. Create ligands and their respective params file

A ligand file for 4HB, pNP and 34DHB were created using Avogadro software (7) and partial charges added using AM1-BCC application in QuacPac package, version 1.3.1 of OpenEye Scientific Software (Santa Fe, NM) (<http://www.eyesopen.com>)

#### 4HB ligand file (phx.mol2)

```

@<TRIPOS>MOLECULE
*****
      16      16      0      0      0
SMALL
USER_CHARGES

@<TRIPOS>ATOM
      1 C1          0.0116    0.6548    0.0000 C.ar      1 <0>      -0.1482
      2 C2         -1.1946   -0.0669   -0.0000 C.ar      1 <0>      -0.0770
      3 C3         -1.1986   -1.4644   -0.0000 C.ar      1 <0>      -0.2387
      4 C4          0.0118   -2.1512   -0.0000 C.ar      1 <0>       0.0827
      5 C5          1.2193   -1.4646   -0.0000 C.ar      1 <0>      -0.1853
      6 C6          1.2179   -0.0671    0.0000 C.ar      1 <0>      -0.0817
      7 C7          0.0087    2.1719    0.0000 C.2       1 <0>       0.9107
      8 O1          1.1388    2.7554    0.0000 O.co2     1 <0>      -0.8323
      9 O2         -1.1258    2.7479    0.0000 O.co2     1 <0>      -0.8353
     10 O3          0.0484   -3.5164   -0.0000 O.3        1 <0>      -0.5241
     11 H1         -2.1358    0.4811   -0.0000 H          1 <0>       0.1499
     12 H2         -2.1493   -1.9844   -0.0000 H          1 <0>       0.1064
     13 H3          2.1593   -2.0051    0.0000 H          1 <0>       0.1219
     14 H4          2.1605    0.4780    0.0000 H          1 <0>       0.1517
     15 H5         -0.8698   -3.8295   -0.0000 H          1 <0>       0.3993
     16 X1          0.0117   -0.7482    0.0000 Du       1 <0>       0.0000

@<TRIPOS>BOND
      1      1      2 ar
      2      1      6 ar
      3      1      7 1
      4      2      3 ar
      5      2     11 1
      6      3      4 ar
      7      3     12 1
      8      4      5 ar
      9      4     10 1
     10      5      6 ar
     11      5     13 1
     12      6     14 1
     13      7      8 2
     14      7      9 1
     15     10     15 1
     16      1     16 1

```

---

pNP ligand file (pnx.mol2)

@<TRIPOS>MOLECULE

\*\*\*\*\*

15 15 0 0 0

SMALL

USER\_CHARGES

@<TRIPOS>ATOM

|    |    |         |         |         |       |   |     |         |
|----|----|---------|---------|---------|-------|---|-----|---------|
| 1  | C1 | -3.6990 | 1.6517  | 0.1014  | C.ar  | 1 | <0> | -0.3255 |
| 2  | C2 | -3.4730 | 0.2716  | 0.0447  | C.ar  | 1 | <0> | -0.0005 |
| 3  | C3 | -2.1635 | -0.1957 | -0.0492 | C.ar  | 1 | <0> | -0.3828 |
| 4  | C4 | -1.0967 | 0.7002  | -0.0860 | C.ar  | 1 | <0> | 0.0003  |
| 5  | C5 | -1.3610 | 2.0734  | -0.0272 | C.ar  | 1 | <0> | -0.3261 |
| 6  | C6 | -2.6620 | 2.6039  | 0.0681  | C.ar  | 1 | <0> | 0.5742  |
| 7  | N1 | -1.9071 | -1.6355 | -0.1095 | N.pl3 | 1 | <0> | 0.3401  |
| 8  | O1 | -2.8809 | -2.4056 | -0.0771 | O.2   | 1 | <0> | -0.3088 |
| 9  | O2 | -0.7282 | -2.0175 | -0.1902 | O.2   | 1 | <0> | -0.3091 |
| 10 | O3 | -2.8849 | 3.8558  | 0.1206  | O.3   | 1 | <0> | -0.7327 |
| 11 | H1 | -4.7250 | 2.0136  | 0.1749  | H     | 1 | <0> | 0.1136  |
| 12 | H2 | -4.3241 | -0.4001 | 0.0754  | H     | 1 | <0> | 0.1215  |
| 13 | H3 | -0.0668 | 0.3678  | -0.1588 | H     | 1 | <0> | 0.1202  |
| 14 | H4 | -0.5237 | 2.7713  | -0.0563 | H     | 1 | <0> | 0.1155  |
| 15 | X1 | -2.3978 | 1.1759  | -0.0077 | Du    | 1 | <0> | 0.0000  |

@<TRIPOS>BOND

|    |   |    |    |
|----|---|----|----|
| 1  | 1 | 2  | ar |
| 2  | 2 | 3  | ar |
| 3  | 3 | 4  | ar |
| 4  | 4 | 5  | ar |
| 5  | 5 | 6  | ar |
| 6  | 1 | 6  | ar |
| 7  | 3 | 7  | 1  |
| 8  | 7 | 8  | 2  |
| 9  | 7 | 9  | 2  |
| 10 | 6 | 10 | 1  |
| 11 | 1 | 11 | 1  |
| 12 | 2 | 12 | 1  |
| 13 | 4 | 13 | 1  |
| 14 | 5 | 14 | 1  |
| 15 | 1 | 15 | 1  |

---

34DHB ligand file (dhx.mol2)

@<TRIPOS>MOLECULE

\*\*\*\*\*

17 17 0 0 0

SMALL

USER\_CHARGES

@<TRIPOS>ATOM

|   |    |         |         |         |      |   |     |         |
|---|----|---------|---------|---------|------|---|-----|---------|
| 1 | C1 | -2.7452 | 1.7819  | -0.1371 | C.ar | 1 | <0> | -0.1065 |
| 2 | C2 | -2.7630 | 0.3861  | -0.2071 | C.ar | 1 | <0> | -0.1996 |
| 3 | C3 | -1.5614 | -0.3065 | -0.1366 | C.ar | 1 | <0> | 0.0018  |
| 4 | C4 | -0.3566 | 0.3803  | 0.0019  | C.ar | 1 | <0> | 0.0732  |
| 5 | C5 | -0.3330 | 1.7670  | 0.0720  | C.ar | 1 | <0> | -0.1038 |
| 6 | C6 | -1.5358 | 2.4935  | 0.0030  | C.ar | 1 | <0> | -0.1214 |

|    |    |         |         |         |       |   |     |         |
|----|----|---------|---------|---------|-------|---|-----|---------|
| 7  | C7 | -1.5399 | 4.0084  | 0.0770  | C.2   | 1 | <0> | 0.9101  |
| 8  | O1 | 0.8146  | -0.3231 | 0.0693  | O.3   | 1 | <0> | -0.5121 |
| 9  | O2 | -1.5165 | -1.6744 | -0.1998 | O.3   | 1 | <0> | -0.5386 |
| 10 | O3 | -0.4173 | 4.5897  | 0.2032  | O.co2 | 1 | <0> | -0.8261 |
| 11 | O4 | -2.6721 | 4.5840  | 0.0068  | O.co2 | 1 | <0> | -0.8321 |
| 12 | H1 | -3.6784 | 2.3410  | -0.1908 | H     | 1 | <0> | 0.1561  |
| 13 | H2 | -3.7138 | -0.1222 | -0.3148 | H     | 1 | <0> | 0.1066  |
| 14 | H3 | 0.6099  | 2.2967  | 0.1801  | H     | 1 | <0> | 0.1689  |
| 15 | H4 | 0.5295  | -1.2536 | -0.0011 | H     | 1 | <0> | 0.4137  |
| 16 | H5 | -2.4335 | -1.9815 | -0.2946 | H     | 1 | <0> | 0.4096  |
| 17 | X1 | -1.5480 | 1.0765  | -0.0675 | Du    | 1 | <0> | 0.0000  |

@<TRIPOS>BOND

|    |   |    |    |
|----|---|----|----|
| 1  | 1 | 2  | ar |
| 2  | 2 | 3  | ar |
| 3  | 3 | 4  | ar |
| 4  | 4 | 5  | ar |
| 5  | 5 | 6  | ar |
| 6  | 1 | 6  | ar |
| 7  | 6 | 7  | 1  |
| 8  | 4 | 8  | 1  |
| 9  | 3 | 9  | 1  |
| 10 | 7 | 10 | 2  |
| 11 | 7 | 11 | 1  |
| 12 | 1 | 12 | 1  |
| 13 | 2 | 13 | 1  |
| 14 | 5 | 14 | 1  |
| 15 | 8 | 15 | 1  |
| 16 | 9 | 16 | 1  |
| 17 | 2 | 17 | 1  |

---

Params file created using following command line:  
 /mypath/molfile\_to\_params.py lig.mol2 -n lig

(where lig refers to phx, pnx and dhx for 4HB, pNP and 34DHB respectively)

```

NAME phx
IO_STRING phx Z
TYPE LIGAND
AA UNK
ATOM C6 aroC X -0.08
ATOM C1 aroC X -0.15
ATOM C2 aroC X -0.08
ATOM C3 aroC X -0.24
ATOM C4 aroC X 0.08
ATOM C5 aroC X -0.19
ATOM H3 Haro X 0.12
ATOM O3 OH X -0.52
ATOM H5 Hpol X 0.40
ATOM H2 Haro X 0.11
ATOM H1 Haro X 0.15
ATOM C7 COO X 0.91
ATOM O1 OOC X -0.83
ATOM O2 OOC X -0.84
ATOM X1 VIRT VIRT 0.00
ATOM H4 Haro X 0.15
BOND C1 C2

```

```

BOND  C1  C6
BOND  C1  C7
BOND  C2  C3
BOND  C2  H1
BOND  C3  C4
BOND  C3  H2
BOND  C4  C5
BOND  C4  O3
BOND  C5  C6
BOND  C5  H3
BOND  C6  H4
BOND  C7  O1
BOND  C7  O2
BOND  O3  H5
BOND  C1  X1
CHI 1  C3  C4  O3  H5
PROTON_CHI 1 SAMPLES 2 0 180 EXTRA 1 20
CHI 2  C6  C1  C7  O1
NBR_ATOM  C6
NBR_RADIUS 4.743740
ICOOR_INTERNAL  C6  0.000000  0.000000  0.000000  C6  C1  C2
ICOOR_INTERNAL  C1  0.000000  180.000000  1.405809  C6  C1  C2
ICOOR_INTERNAL  C2  0.000000  61.791205  1.405621  C1  C6  C2
ICOOR_INTERNAL  C3  0.000000  58.942854  1.397506  C2  C1  C6
ICOOR_INTERNAL  C4  0.000000  60.592736  1.391676  C3  C2  C1
ICOOR_INTERNAL  C5  0.000000  59.194374  1.389056  C4  C3  C2
ICOOR_INTERNAL  H3  180.000000  59.522018  1.084316  C5  C4  C3
ICOOR_INTERNAL  O3  180.000000  58.893052  1.365691  C4  C3  C5
ICOOR_INTERNAL  H5  0.000000  72.706660  0.970115  O3  C4  C3
ICOOR_INTERNAL  H2  180.000000  61.158872  1.083619  C3  C2  C4
ICOOR_INTERNAL  H1  180.000000  61.102632  1.089110  C2  C1  C3
ICOOR_INTERNAL  C7  180.000000  58.992423  1.517103  C1  C6  C2
ICOOR_INTERNAL  O1  0.000000  62.801041  1.271848  C7  C1  C6
ICOOR_INTERNAL  O2  180.000000  62.972996  1.272347  C7  C1  O1
ICOOR_INTERNAL  X1  180.000000  120.902137  1.403000  C1  C6  C7
ICOOR_INTERNAL  H4  180.000000  60.938594  1.088866  C6  C1  C2
PDB_ROTAMERS phx.rotlib18.pdb
-----

```

```

NAME pnx
IO_STRING pnx Z
TYPE LIGAND
AA UNK
ATOM  C2  aroC  X  -0.00
ATOM  C1  aroC  X  -0.33
ATOM  C6  aroC  X   0.57
ATOM  C5  aroC  X  -0.33
ATOM  C4  aroC  X   0.00
ATOM  C3  aroC  X  -0.38
ATOM  N1  Npro  X   0.34
ATOM  O1  ONH2  X  -0.31
ATOM  O2  ONH2  X  -0.31
ATOM  H3  Haro  X   0.12
ATOM  H4  Haro  X   0.12
ATOM  O3  OOC   X  -0.73
ATOM  X1  VIRT  VIRT 0.00
ATOM  H1  Haro  X   0.11

```

```

ATOM  H2  Haro  X   0.12
BOND  C1  C2
BOND  C2  C3
BOND  C3  C4
BOND  C4  C5
BOND  C5  C6
BOND  C1  C6
BOND  C3  N1
BOND  N1  O1
BOND  N1  O2
BOND  C6  O3
BOND  C1  H1
BOND  C2  H2
BOND  C4  H3
BOND  C5  H4
BOND  C1  X1
CHI 1  C4  C3  N1  O1
NBR_ATOM  C2
NBR_RADIUS 4.099173
ICOOR_INTERNAL  C2  0.000000  0.000000  0.000000  C2  C1  C6
ICOOR_INTERNAL  C1  0.000000  180.000000  1.399631  C2  C1  C6
ICOOR_INTERNAL  C6  0.000000  56.847968  1.408248  C1  C2  C6
ICOOR_INTERNAL  C5  -0.009075  64.710905  1.408231  C6  C1  C2
ICOOR_INTERNAL  C4  0.008738  56.845661  1.399639  C5  C6  C1
ICOOR_INTERNAL  C3  -0.006368  60.982937  1.393576  C4  C5  C6
ICOOR_INTERNAL  N1  -179.995716  60.185166  1.463694  C3  C4  C5
ICOOR_INTERNAL  O1  -179.860391  61.866203  1.241930  N1  C3  C4
ICOOR_INTERNAL  O2  179.997235  61.865234  1.241870  N1  C3  O1
ICOOR_INTERNAL  H3  -179.998885  61.132361  1.084658  C4  C5  C3
ICOOR_INTERNAL  H4  179.990544  61.958932  1.090405  C5  C6  C4
ICOOR_INTERNAL  O3  -179.991952  57.644121  1.272672  C6  C1  C5
ICOOR_INTERNAL  X1  0.722342  119.468740  1.389752  C1  C2  C6
ICOOR_INTERNAL  H1  179.274258  61.189479  1.090436  C1  C2  X1
ICOOR_INTERNAL  H2  -179.996995  61.132795  1.084663  C2  C1  C6
PDB_ROTAMERS pnx.rotlib18.pdb
-----

```

```

NAME dhx
IO_STRING dhx Z
TYPE LIGAND
AA UNK
ATOM  C5  aroC  X   -0.10
ATOM  C4  aroC  X    0.07
ATOM  C3  aroC  X    0.00
ATOM  C2  aroC  X   -0.20
ATOM  C1  aroC  X   -0.11
ATOM  C6  aroC  X   -0.12
ATOM  C7  COO  X    0.91
ATOM  O3  OOC  X   -0.83
ATOM  O4  OOC  X   -0.83
ATOM  H1  Haro  X    0.16
ATOM  X1  VIRT VIRT 0.00
ATOM  H2  Haro  X    0.11
ATOM  O2  OH   X   -0.54
ATOM  H5  Hpol  X    0.41
ATOM  O1  OH   X   -0.51
ATOM  H4  Hpol  X    0.41

```



```

ATOM  H3  Haro  X    0.17
BOND  C1  C2
BOND  C2  C3
BOND  C3  C4
BOND  C4  C5
BOND  C5  C6
BOND  C1  C6
BOND  C6  C7
BOND  C4  O1
BOND  C3  O2
BOND  C7  O3
BOND  C7  O4
BOND  C1  H1
BOND  C2  H2
BOND  C5  H3
BOND  O1  H4
BOND  O2  H5
BOND  C2  X1
CHI 1  C5  C4  O1  H4
PROTON_CHI 1 SAMPLES 2 0 180 EXTRA 1 20
CHI 2  C4  C3  O2  H5
PROTON_CHI 2 SAMPLES 2 0 180 EXTRA 1 20
CHI 3  C1  C6  C7  O3
NBR_ATOM  C5
NBR_RADIUS 4.760854
ICOOR_INTERNAL  C5  0.000000  0.000000  0.000000  C5  C4  C3
ICOOR_INTERNAL  C4  0.000000  0.000000  1.388671  C5  C4  C3
ICOOR_INTERNAL  C3  0.000000  59.216562  1.393707  C4  C5  C3
ICOOR_INTERNAL  C2  -0.001557  59.518600  1.388707  C3  C4  C5
ICOOR_INTERNAL  C1  0.003494  61.019711  1.397668  C2  C3  C4
ICOOR_INTERNAL  C6  -0.002719  58.678849  1.410195  C1  C2  C3
ICOOR_INTERNAL  C7  -179.997200  59.566566  1.516712  C6  C1  C2
ICOOR_INTERNAL  O3  179.997782  62.647581  1.270459  C7  C6  C1
ICOOR_INTERNAL  O4  -179.997467  63.149145  1.272054  C7  C6  O3
ICOOR_INTERNAL  H1  -179.996523  60.049625  1.089192  C1  C2  C6
ICOOR_INTERNAL  X1  -0.005198  120.559891  1.404409  C2  C3  C1
ICOOR_INTERNAL  H2  179.998362  57.969939  1.083508  C2  C3  X1
ICOOR_INTERNAL  O2  -179.997544  62.079148  1.370095  C3  C4  C2
ICOOR_INTERNAL  H5  179.997751  73.195106  0.971693  O2  C3  C4
ICOOR_INTERNAL  O1  -179.998003  60.233430  1.367854  C4  C5  C3
ICOOR_INTERNAL  H4  179.995830  76.310650  0.975740  O1  C4  C5
ICOOR_INTERNAL  H3  179.994519  59.573924  1.086889  C5  C4  C3
PDB_ROTAMERS dhx.rotlib18.pdb

```

8. Command line for ligand docking  
/mypath/ligand\_dock.macosgccrelease @dock\_flags  
where, dock\_flags consists of following options:

```

-database /mypath/rosetta_database
-in:file:s DoubleMut.pdb
-in:file:extra_res_fa dhx.params
-out:file:renumber_pdb
-packing:no_optH
-packing:use_input_sc
-packing:ex1
-packing:ex2
-packing:extrachi_cutoff 1
-docking:randomize2

```

```
-docking:uniform_trans 5
-docking:ligand:minimize_ligand
-docking:ligand:harmonic_torsions 10
-docking:ligand:minimize_backbone
-docking:ligand:harmonic_Calphas 0.3
-docking:ligand:soft_rep
-docking:ligand:protocol abbrev2
-mute core.util.prof
-mute core.io.database
-flip_HNQ
-nstruct 5000
-docking:ligand:start_from 8.4075 12.37 36.728
```

### References:

1. Molina-Henares AJ, Krell T, Eugenia Guazzaroni M, Segura A, Ramos JL (2006) Members of the IclR family of bacterial transcriptional regulators function as activators and/or repressors. *FEMS Microbiol Rev* 30(2):157–186.
2. Stemmer WPC, Crameri A, Ha KD, Brennan TM, Heyneker HL (1995) Single-step assembly of a gene and entire plasmid from large numbers of oligodeoxyribonucleotides. *Gene* 164(1):49–53.
3. Jha RK, Kern TL, Fox DT, M. Strauss CE (2014) Engineering an *Acinetobacter* regulon for biosensing and high-throughput enzyme screening in *E. coli* via flow cytometry. *Nucleic Acids Res* 42(12):8150–8160.
4. Watkins LM, Mahoney HJ, McCulloch JK, Raushel FM (1997) Augmented hydrolysis of diisopropyl fluorophosphate in engineered mutants of phosphotriesterase. *J Biol Chem* 272(41):25596–25601.
5. Cho CM-H, Mulchandani A, Chen W (2006) Functional analysis of organophosphorus hydrolase variants with high degradation activity towards organophosphate pesticides. *Protein Eng Des Sel* 19(3):99–105.
6. Jha RK, Chakraborti S, Kern TL, Fox DT, Strauss CEM (2015) Rosetta comparative modeling for library design: Engineering alternative inducer specificity in a transcription factor. *Proteins Struct Funct Bioinforma* 83(7):1327–1340.
7. Hanwell MD, et al. (2012) Avogadro: an advanced semantic chemical editor, visualization, and analysis platform. *J Cheminformatics* 4(1):17.
